# Supplementary material
Source: Research Square preprint supplement (doi:10.21203/rs.3.rs-8565284/v1)
Supplement: Supplementary file 1 [file 1cf17e81a65346a450541776.docx]

**Supplemental Material**

Table S1. Summary of the column operation

| Parameters | | 1st regeneration | | 2nd regeneration | | 3rd regeneration | | 4th regeneration | | unit |
| --- | --- | --- | --- | --- | --- | --- | --- | --- | --- | --- |
| C1 | C2 | C1 | C2 | C1 | C2 | C1 | C2 |
| Packed bed height | Z | 0.2 | 0.2 | 0.2 | 0.2 | 0.2 | 0.2 | 0.2 | 0.2 | m |
| Treatment volume | VE | 556 | 544 | 555 | 538 | 483 | 477 | 446 | 440 | L |
| Breakthrough volume | VBT | 374 | 362 | 356 | 344 | 302 | 284 | 254 | 224 | L |
| Adsorbed amount of As(V) in Column | Xb | 0.51 | 0.49 | 0.45 | 0.43 | 0.39 | 0.38 | 0.37 | 0.36 | g |
| Desorbed amount of As(V) | Xd | 0.50 | 0.47 | 0.43 | 0.40 | 0.37 | 0.36 | 0.35 | 0.34 | g |
| Weight of magnetite | mm | 80 | 80 | 80 | 80 | 80 | 80 | 80 | 80 | g |
| Influent flow rate | Q | 6.03 | 6.03 | 6.03 | 6.03 | 6.03 | 6.03 | 6.03 | 6.03 | L/d |
| Bed volume | BV | 5088 | 5088 | 9216 | 9216 | 13200 | 13200 | 17088 | 17088 | - |
| Height of mass transfer zone | HMTZ | 0.078 | 0.080 | 0.087 | 0.088 | 0.092 | 0.101 | 0.110 | 0.130 | m |
